# Supplementary material for: Unraveling the modified regulation of ternary substitution on Na3V2(PO4)3 for sodium ion batteries
Source: Royal Society of Chemistry journal article supplement (doi:10.1039/d2ta02647c), 2022-01-01
Supplement: d2ta02647c1.pdf [file d2ta02647c1.pdf]

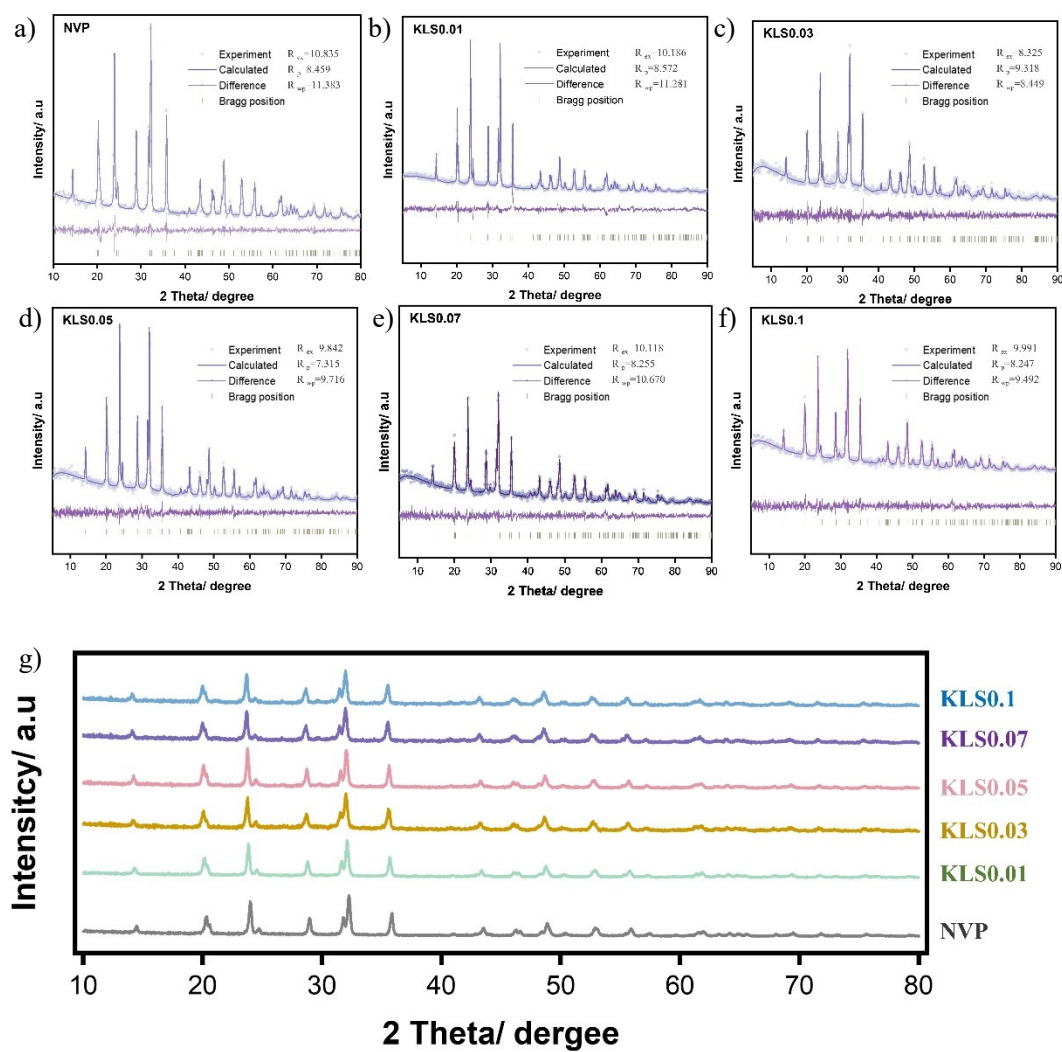

Fig.S1 Rietveld refined XRD patterns of KLS0/0.01/0.03/0.05/0.07/0.1-NVP (a-f) and the XRD patterns of all samples (g)

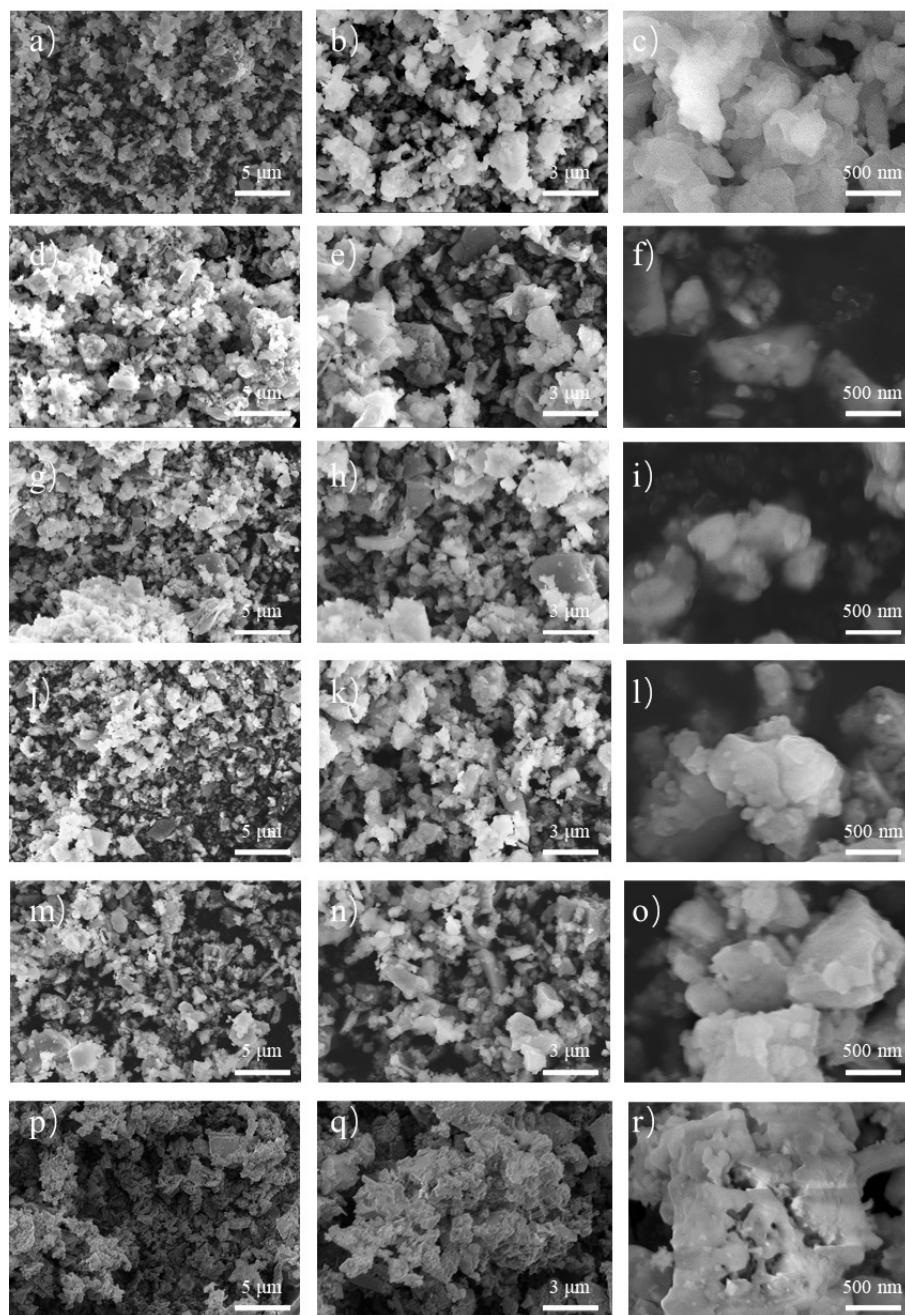

Fig.S2 Different magnification times at 5000/15000/50000 of NVP (a-c), KLS0.01 (d-f), KLS0.03 (g-i), KLS0.05 (j-l), KLS0.07 (m-o) and KLS0.1 (p-r).

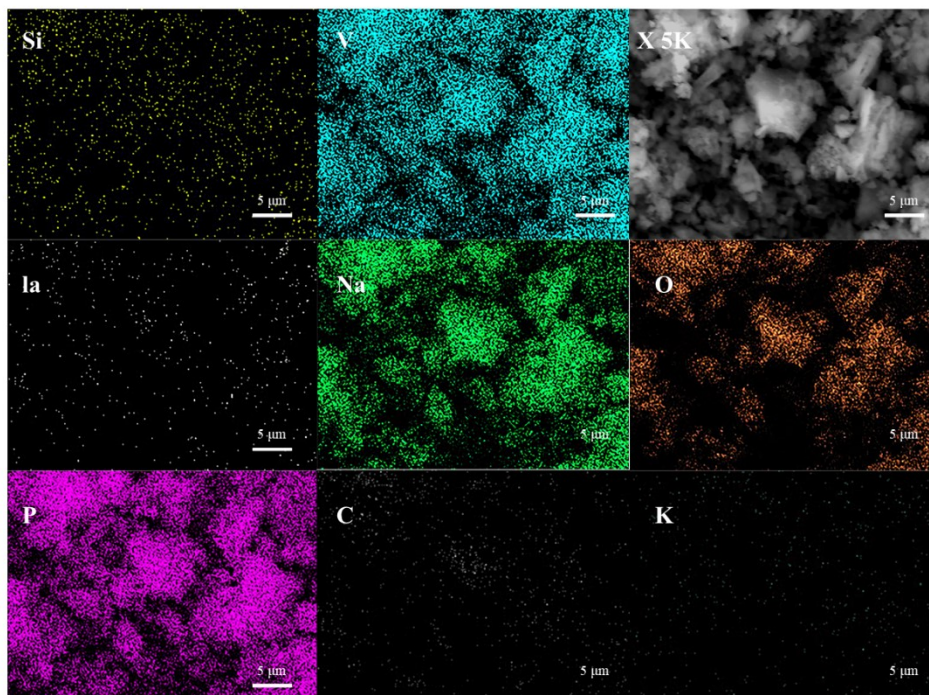

Fig.S3 The EDS spectrum of KLS0.07 with original image and every dispersed states of elements

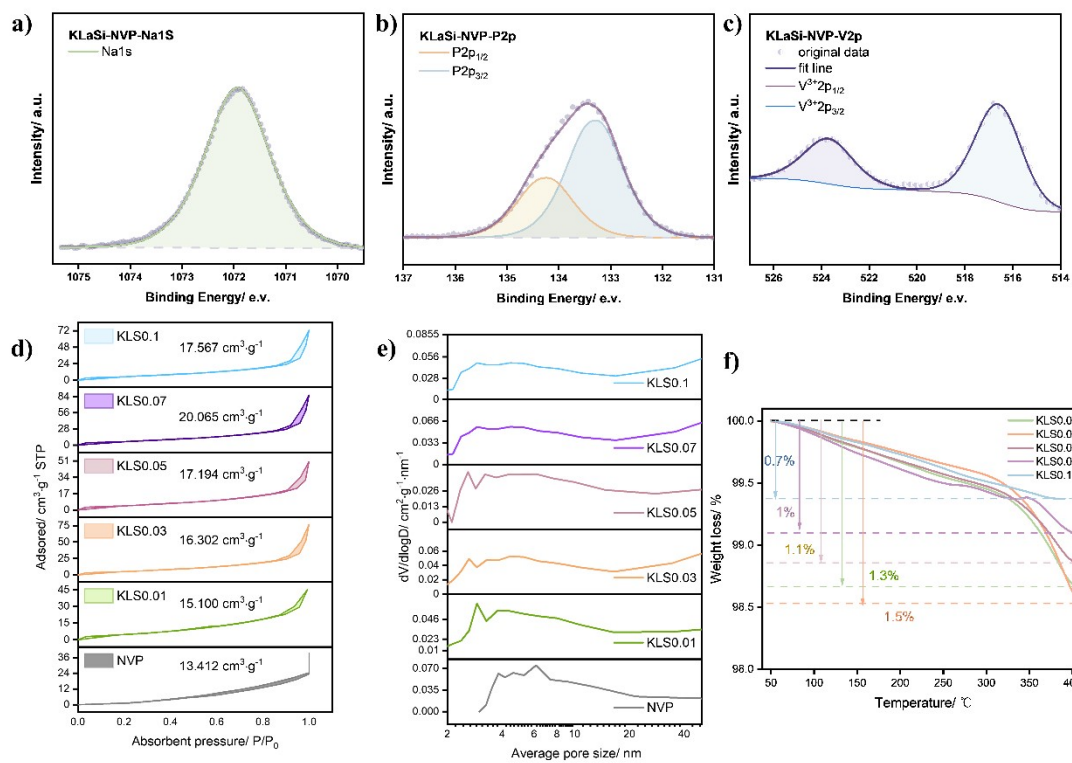

Fig.S4 The XPS testing results of Na 1s (a), V 2p (b), P 2p (c) and the BET curves (d), BJH broken lines (e) and TG curves of KLS samples (f).

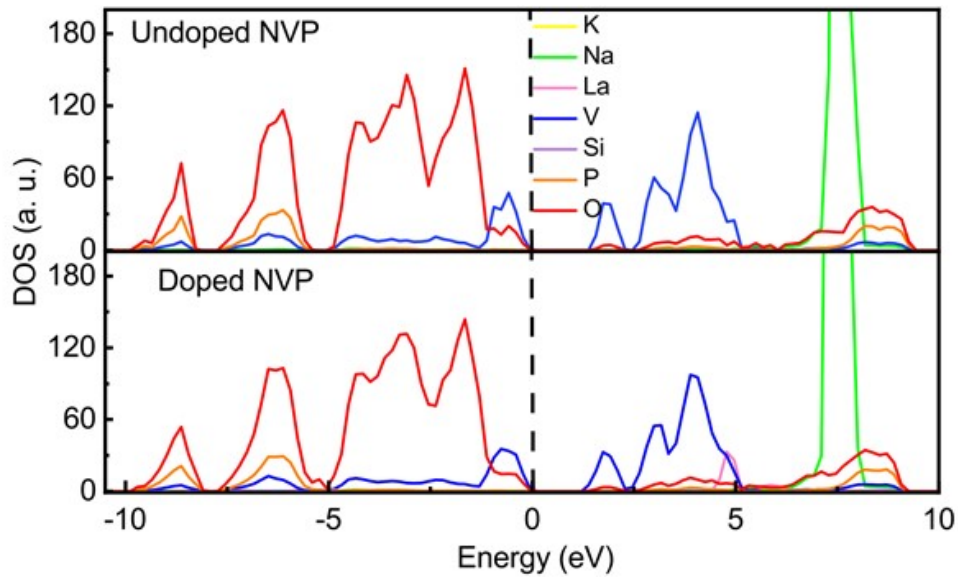

Fig.S5 Specific DOS mapping of all the elements in NVP before and after doping.

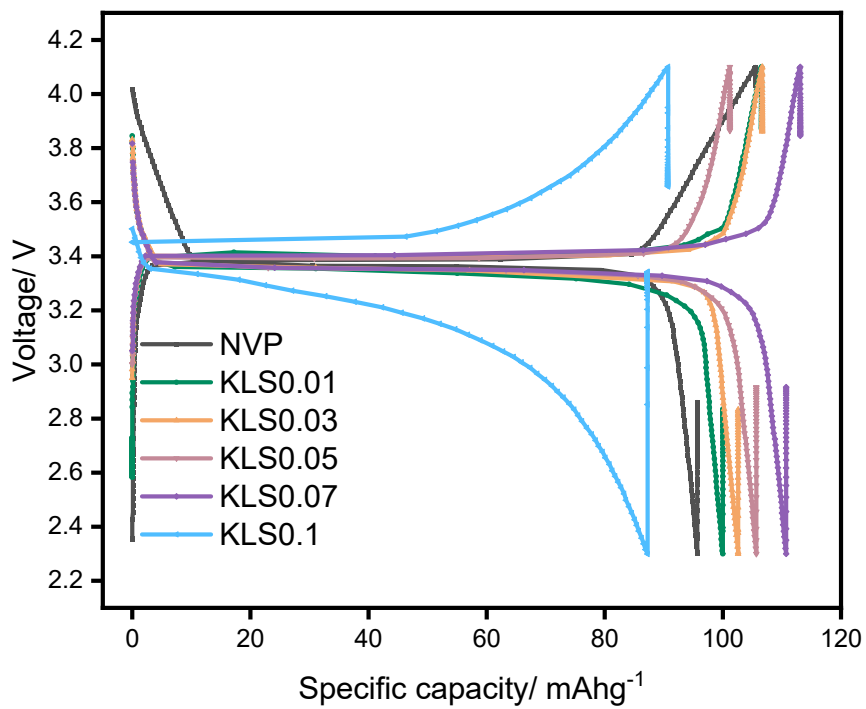

Fig.S6 Initial charging and discharging profiles at 1C of all the samples.

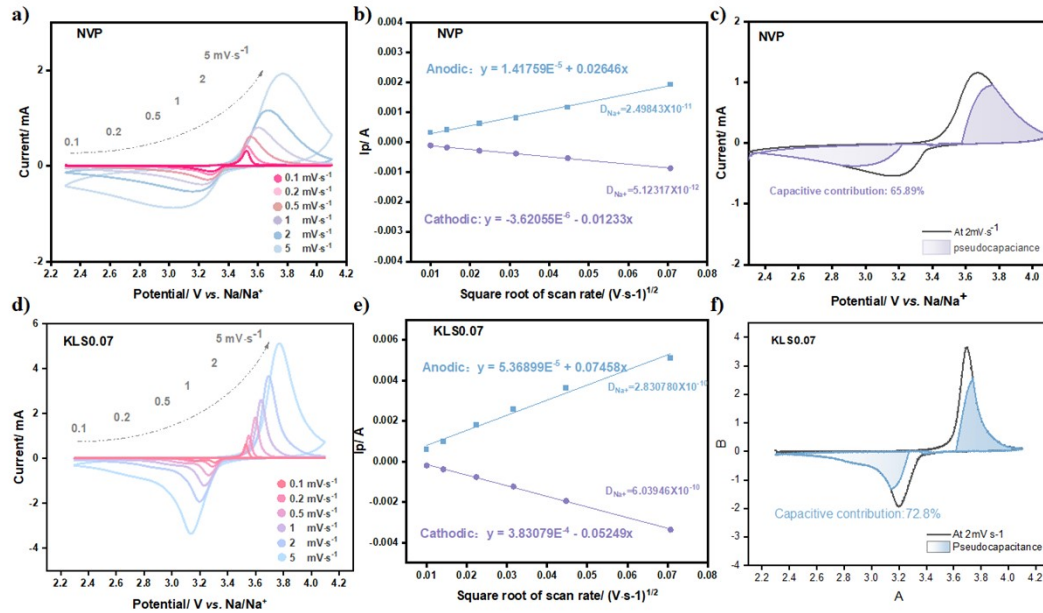

Fig.S7 Cyclic voltammogram (CV) curves of NVP and KLS0.07 at various scanning rates (a, d), the fit line between  $I_p$  and scan rate of NVP and KLS0.07 (b, e) and their corresponding pseudocapacitance (c, f).

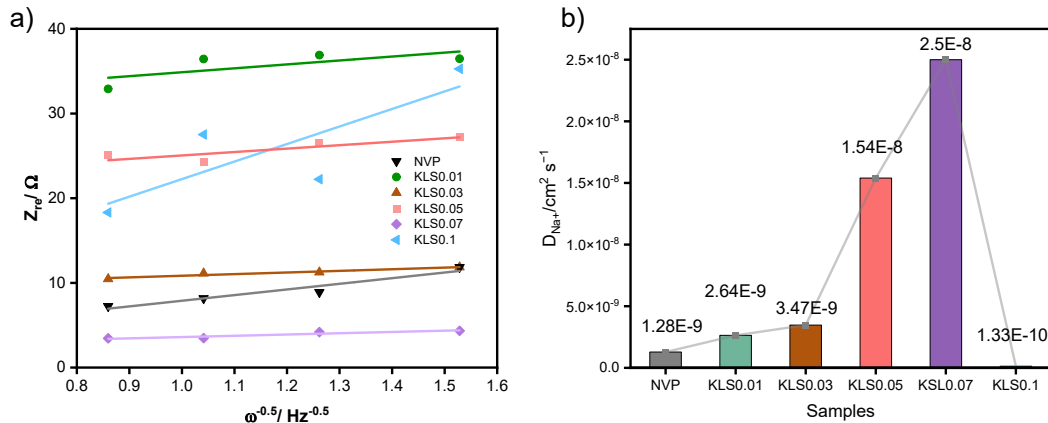

Fig.S8 The relationship for  $\omega^{-1/2}$  and  $Z_{re}$  of all samples at 3.4 V (a), the corresponding diffusion coefficient of sodium ion of all samples.

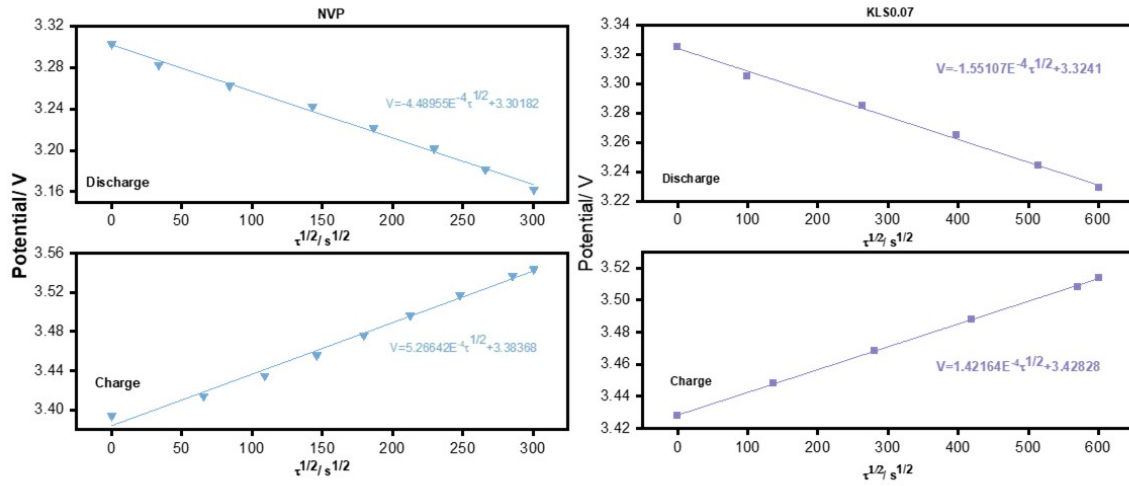

Fig.S9 The fitting condition between  $\tau^{1/2}$  and V of NVP and KLS0.07 samples during dis/charge progress.

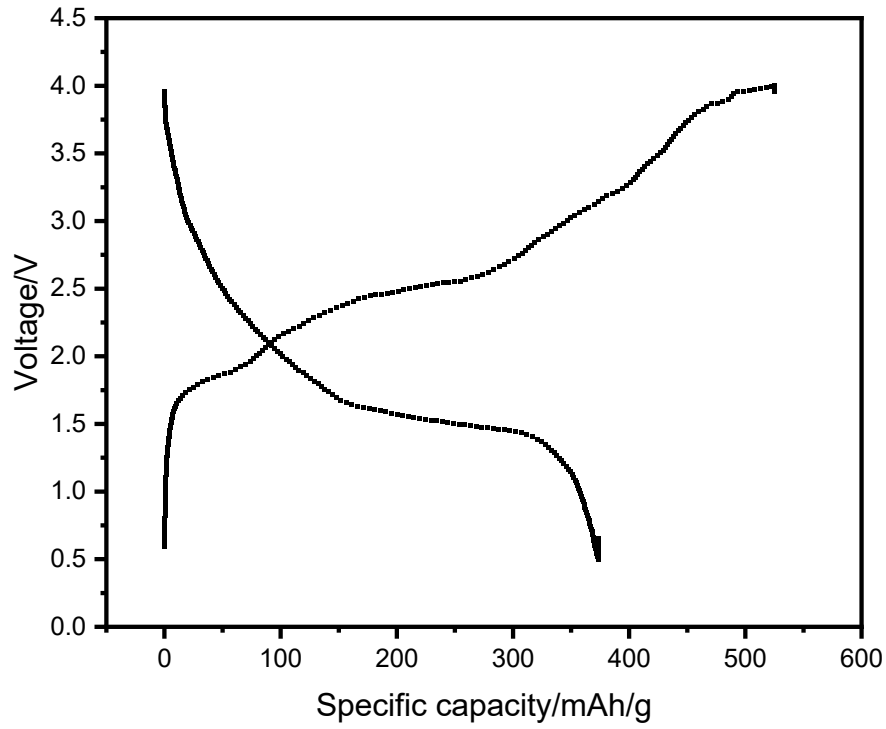

Fig.S10 The typical charge-discharge curves of full-cell KLS0.07//CoSe<sub>2</sub> at 1C.

Table.S1 Reaction material composition list of Na<sub>3.1-x</sub>K<sub>x</sub>V<sub>2-x</sub>La<sub>x</sub>(PO<sub>4</sub>)<sub>2.9</sub>(SiO<sub>4</sub>)<sub>0.1</sub> samples.

| Samples | NH <sub>4</sub> VO <sub>3</sub> /g | CH <sub>3</sub> COONa/g | NH <sub>4</sub> H <sub>2</sub> PO <sub>4</sub> /g | KH <sub>2</sub> PO <sub>4</sub> /g | LaN <sub>3</sub> O <sub>9</sub> /g | C <sub>8</sub> H <sub>20</sub> O <sub>4</sub> Si/g |
|---------|------------------------------------|-------------------------|---------------------------------------------------|------------------------------------|------------------------------------|----------------------------------------------------|
| NVP     | 2.0537                             | 2.1600                  | 3.0290                                            | /                                  | /                                  | /                                                  |
| KLS0.01 | 2.0299                             | 2.2098                  | 2.8982                                            | 0.0119                             | 0.0378                             | 0.1816                                             |
| KLS0.03 | 2.0002                             | 2.1856                  | 2.8652                                            | 0.0354                             | 0.1127                             | 0.1808                                             |
| KLS0.05 | 1.9710                             | 2.1616                  | 2.8324                                            | 0.0588                             | 0.1871                             | 0.1800                                             |
| KLS0.07 | 1.9420                             | 2.1378                  | 2.7999                                            | 0.0819                             | 0.2607                             | 0.1792                                             |

KLS0.1      1.8991      2.1025      2.7518      0.1163      0.3700      0.1780

---

Table.S2 The position information of KLS0.07 ( $\text{Na}_{3.03}\text{V}_{1.93}\text{La}_{0.07}(\text{PO}_4)_{2.9}(\text{SiO}_4)_{0.1}$ ) extracted from Rietveld refined XRD pattern by Fullprof software.

| Atom | Mult. | x      | y     | z      | Uiso  | Occ.  |
|------|-------|--------|-------|--------|-------|-------|
| Na1  | 12    | 0.333  | 0.667 | -0.405 | 0.127 | 0.234 |
| Na2  | 36    | 0.609  | 0.916 | 0.008  | 0.011 | 0.695 |
| K1   | 12    | 0.333  | 0.667 | -0.405 | 0.011 | 0.071 |
| V1   | 12    | 0.333  | 0.666 | 0.010  | 0.945 | 0.931 |
| La1  | 12    | 0.333  | 0.666 | 0.010  | 0.945 | 0.069 |
| P1   | 18    | 0.233  | 0.578 | 0.222  | 0.008 | 0.906 |
| Si1  | 18    | 0.233  | 0.578 | 0.222  | 0.008 | 0.094 |
| O1   | 36    | -0.003 | 0.376 | 0.099  | 0.004 | 1.000 |
| O2   | 36    | 0.538  | 0.823 | -0.037 | 0.013 | 1.000 |

---



Table.S3 The position information of KLS0.07 and extracted from Rietveld refined XRD pattern by XRD and DFT calculations, respectively.

| Samples   | Structural information |       |                        |
|-----------|------------------------|-------|------------------------|
|           | a=b/ Å                 | c/ Å  | Volume/ Å <sup>3</sup> |
| NVP(DFT)  | 8.90                   | 21.85 | 1498.86                |
| Doped NVP | 8.95                   | 22.08 | 1530.00                |

Table.S4 The comparison of calculated diffusion coefficients of Na<sup>+</sup> for NVP and KLS0.07 by CV

| Samples | D <sub>Na<sup>+</sup>-Anode,CV</sub> | D <sub>Na<sup>+</sup>-Cathode,CV</sub> |
|---------|--------------------------------------|----------------------------------------|
| NVP     | 2.498x10 <sup>-11</sup>              | 5.123x10 <sup>-12</sup>                |
| KLS0.07 | 2.831x10 <sup>-10</sup>              | 6.039x10 <sup>-12</sup>                |

Table.S5 The charge transfer resistant (R<sub>ct</sub>) of Na<sub>3.1-x</sub>K<sub>x</sub>V<sub>2-x</sub>La<sub>x</sub>(PO<sub>4</sub>)<sub>2.9</sub>(SiO<sub>4</sub>)<sub>0.1</sub> samples.

| Samples | R <sub>ct</sub> / Ω | σ    | D <sub>Na<sup>+</sup>-EIS</sub> |
|---------|---------------------|------|---------------------------------|
| NVP     | 370.6               | 6.67 | 1.28x10 <sup>-9</sup>           |
| KLS0.01 | 531.2               | 4.64 | 2.64x10 <sup>-9</sup>           |
| KLS0.03 | 185.3               | 4.05 | 3.47x10 <sup>-9</sup>           |

|         |       |       |                        |
|---------|-------|-------|------------------------|
| KLS0.05 | 156.0 | 1.92  | $1.54 \times 10^{-8}$  |
| KLS0.07 | 116.7 | 1.51  | $2.50 \times 10^{-8}$  |
| KLS0.1  | 230   | 20.71 | $1.33 \times 10^{-10}$ |

Table.S6 The comparison of calculated diffusion coefficients of  $\text{Na}^+$  for NVP and KLS0.07 by GITT

| Samples | $D_{\text{Na}^+\text{-Charge,GITT}}$ | $D_{\text{Na}^+\text{-Discharge,GITT}}$ |
|---------|--------------------------------------|-----------------------------------------|
| NVP     | $0.5\text{-}1.8 \times 10^{-10}$     | $1.4\text{-}3.7 \times 10^{-10}$        |
| KLS0.07 | $1.0\text{-}2.2 \times 10^{-10}$     | $1.5\text{-}4.1 \times 10^{-10}$        |

Table.S7 The comparison of electrochemical performance between KLS0.07// $\text{CoSe}_2$  and other NVP-based full-cell.

| Samples                   | Cycling performance                           | Rate performance             | Ref.      |
|---------------------------|-----------------------------------------------|------------------------------|-----------|
| KLS0.07// $\text{CoSe}_2$ | $95 \text{mAhg}^{-1}$ at 1C after 100 cycles  | $100 \text{mAhg}^{-1}$ at 5C | This work |
| HC//NVPF@rGO              | $100 \text{mAhg}^{-1}$ at 1C after 100 cycles | $60 \text{mAhg}^{-1}$ at 50C | Ref.17    |
| NVPMK//NVPMK              | $50 \text{mAhg}^{-1}$ at 10C after 500 cycles | $50 \text{mAhg}^{-1}$ at 10C | Ref.38    |
| HC//NVPSi0.05             | $90 \text{mAhg}^{-1}$ at 1C after 140 cycles  | $102 \text{mAhg}^{-1}$ at 1C | Ref.41    |
| Zr0.1-NVP//Zr0.1-NVP      | $70 \text{mAhg}^{-1}$ at 5C after 100 cycles  | $60 \text{mAhg}^{-1}$ at 40C | Ref.43    |
| BFCF-NVP//PGN/SiC         | $30 \text{mAhg}^{-1}$ at 1C after 1600 cycles | $52 \text{mAhg}^{-1}$ at 1C  | Ref.44    |
